# Supplementary material for: Cobalt and Iron Phthalocyanine Derivatives: Effect of Substituents on the Structure of Thin Films and Their Sensor Response to Nitric Oxide
Source: MDPI journal article supplement (doi:10.3390/bios13040484), 2023-04-17
Supplement: s1 [file s1]

# Cobalt and Iron Phthalocyanine Derivatives: Effect of Substituents on the Structure of Thin Films and Their Sensor Response to Nitric Oxide

Darya Klyamer<sup>1</sup>, Wenping Shao<sup>2</sup>, Pavel Krasnov<sup>3</sup>, Aleksandr Sukhikh<sup>1</sup>, Svetlana Dorovskikh<sup>1</sup>, Pavel Popovetskiy<sup>1</sup>, Xianchun Li<sup>2</sup> and Tamara Basova<sup>1,\*</sup>

<sup>1</sup> Nikolaev Institute of Inorganic Chemistry SB RAS, Novosibirsk 630090, Russia; klyamer@niic.nsc.ru (D.K.); a\_sukhikh@niic.nsc.ru (A.S.); reter16@yandex.ru (S.D.); popovetskiy@niic.nsc.ru (P.P.)

<sup>2</sup> School of Chemical Engineering, University of Science and Technology Liaoning, Anshan 114051, China; shaowp0318@163.com (W.S.); xianchunli@ustl.edu.cn (X.L.)

<sup>3</sup> International Research Center of Spectroscopy and Quantum Chemistry, Siberian Federal University, Krasnoyarsk 660074, Russia; kpo1980@gmail.com

\* Correspondence: basova@niic.nsc.ru

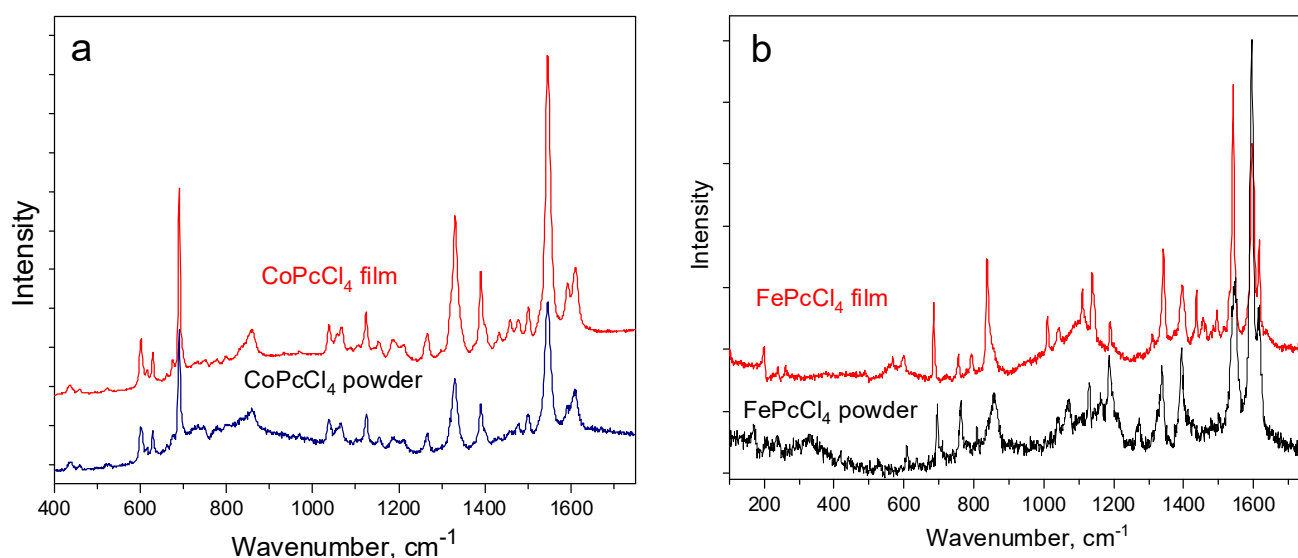

**Figure S1.** Raman spectra of CoPcCl<sub>4</sub> (a) and FePcCl<sub>4</sub> (b) films and powders. Differences in the ratio of intensities of some bands may be due to preferential orientation of thin films relative to the substrate surface.

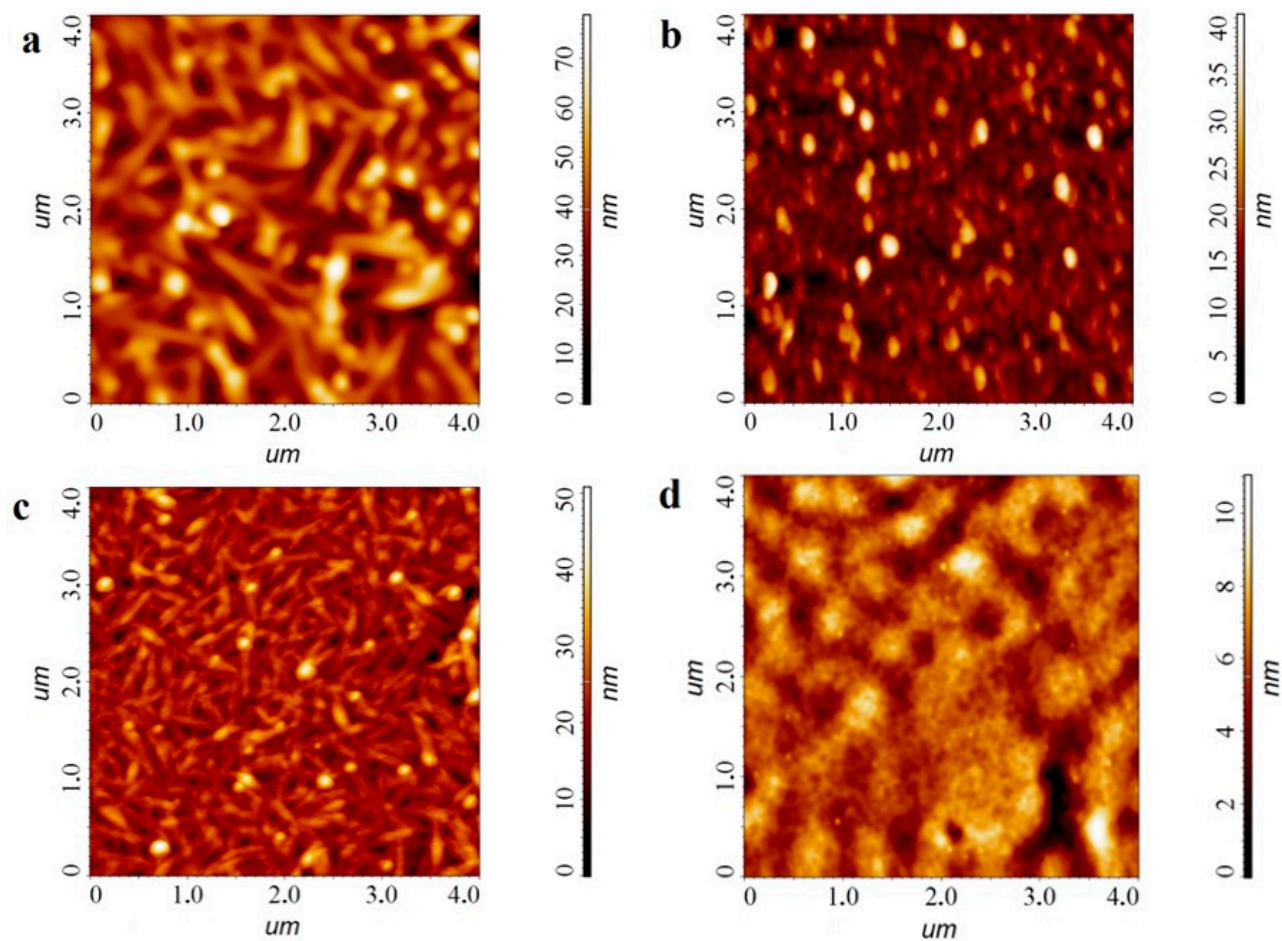

**Figure S2.** 2D AFM images of FePc (a), FePcF<sub>4</sub> (b), FePcCl<sub>4</sub> (c), and FePc(tBu)<sub>4</sub> (d) films.

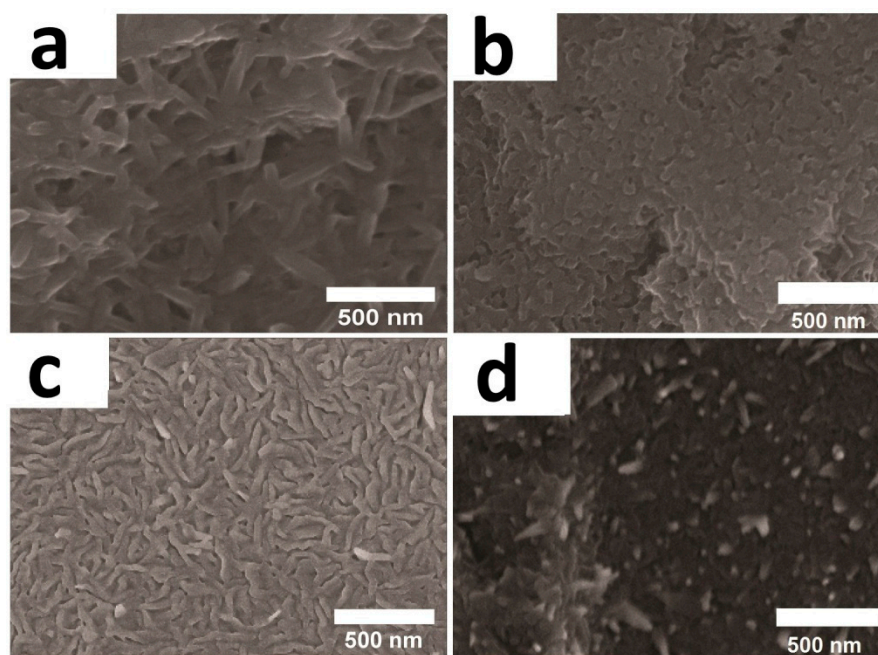

**Figure S3.** SEM images of FePc (a), FePcF<sub>4</sub> (b), FePcCl<sub>4</sub> (c), and FePc(tBu)<sub>4</sub> (d) films.

**Table S1.** Topological parameters at bond critical points and binding energy of the NO molecule with cobalt and iron phthalocyanines.

| Aggregate                | BCP | M = Co                    |                                   |                        | M = Fe                    |                                   |                        |
|--------------------------|-----|---------------------------|-----------------------------------|------------------------|---------------------------|-----------------------------------|------------------------|
|                          |     | $\rho(\mathbf{r})$ , a.u. | $\nabla^2\rho(\mathbf{r})$ , a.u. | $h(\mathbf{r})$ , a.u. | $\rho(\mathbf{r})$ , a.u. | $\nabla^2\rho(\mathbf{r})$ , a.u. | $h(\mathbf{r})$ , a.u. |
| MPc/NO-1                 | 1   | $7.1\cdot 10^{-3}$        | $2.3\cdot 10^{-2}$                | $1.3\cdot 10^{-3}$     | $7.3\cdot 10^{-3}$        | $2.4\cdot 10^{-2}$                | $1.3\cdot 10^{-3}$     |
|                          | 2   | $1.5\cdot 10^{-2}$        | $5.4\cdot 10^{-2}$                | $2.6\cdot 10^{-3}$     | $1.6\cdot 10^{-2}$        | $5.5\cdot 10^{-2}$                | $2.6\cdot 10^{-3}$     |
|                          | 3   | $7.0\cdot 10^{-3}$        | $2.3\cdot 10^{-2}$                | $1.3\cdot 10^{-3}$     | $7.4\cdot 10^{-3}$        | $2.4\cdot 10^{-2}$                | $1.3\cdot 10^{-3}$     |
| MPc/NO-2                 | 1   | $6.3\cdot 10^{-3}$        | $1.9\cdot 10^{-2}$                | $9.3\cdot 10^{-4}$     | $6.4\cdot 10^{-3}$        | $1.9\cdot 10^{-2}$                | $9.4\cdot 10^{-4}$     |
|                          | 2   | $5.7\cdot 10^{-3}$        | $2.0\cdot 10^{-2}$                | $9.8\cdot 10^{-4}$     | $5.8\cdot 10^{-3}$        | $2.0\cdot 10^{-2}$                | $9.9\cdot 10^{-4}$     |
| MPc/NO-3                 | 1   | $6.2\cdot 10^{-3}$        | $1.9\cdot 10^{-2}$                | $9.1\cdot 10^{-4}$     | $6.6\cdot 10^{-3}$        | $2.0\cdot 10^{-2}$                | $9.6\cdot 10^{-4}$     |
|                          | 2   | $5.2\cdot 10^{-3}$        | $1.8\cdot 10^{-2}$                | $8.7\cdot 10^{-4}$     | $5.2\cdot 10^{-3}$        | $1.8\cdot 10^{-2}$                | $8.7\cdot 10^{-4}$     |
| MPcF <sub>4</sub> /NO-1  | 1   | $7.0\cdot 10^{-3}$        | $2.3\cdot 10^{-2}$                | $1.3\cdot 10^{-3}$     | $7.3\cdot 10^{-3}$        | $2.4\cdot 10^{-2}$                | $1.3\cdot 10^{-3}$     |
|                          | 2   | $1.5\cdot 10^{-2}$        | $5.3\cdot 10^{-2}$                | $2.6\cdot 10^{-3}$     | $1.5\cdot 10^{-2}$        | $5.4\cdot 10^{-2}$                | $2.6\cdot 10^{-3}$     |
|                          | 3   | $7.3\cdot 10^{-3}$        | $2.4\cdot 10^{-2}$                | $1.3\cdot 10^{-3}$     | $7.4\cdot 10^{-3}$        | $2.4\cdot 10^{-2}$                | $1.3\cdot 10^{-3}$     |
| MPcF <sub>4</sub> /NO-2  | 1   | $6.5\cdot 10^{-3}$        | $2.0\cdot 10^{-2}$                | $9.7\cdot 10^{-4}$     | $6.3\cdot 10^{-3}$        | $1.9\cdot 10^{-2}$                | $9.3\cdot 10^{-4}$     |
|                          | 2   | $6.1\cdot 10^{-3}$        | $2.1\cdot 10^{-2}$                | $1.1\cdot 10^{-3}$     | $5.8\cdot 10^{-3}$        | $2.0\cdot 10^{-2}$                | $9.9\cdot 10^{-4}$     |
| MPcF <sub>4</sub> /NO-3  | 1   | $6.8\cdot 10^{-3}$        | $2.2\cdot 10^{-2}$                | $1.2\cdot 10^{-3}$     | $6.9\cdot 10^{-3}$        | $2.2\cdot 10^{-2}$                | $1.2\cdot 10^{-3}$     |
|                          | 2   | $7.0\cdot 10^{-3}$        | $2.9\cdot 10^{-2}$                | $1.5\cdot 10^{-3}$     | $6.8\cdot 10^{-3}$        | $2.9\cdot 10^{-2}$                | $1.5\cdot 10^{-3}$     |
| MPcF <sub>4</sub> /NO-4  | 1   | $6.4\cdot 10^{-3}$        | $2.1\cdot 10^{-2}$                | $1.1\cdot 10^{-3}$     | $6.8\cdot 10^{-3}$        | $2.2\cdot 10^{-2}$                | $1.2\cdot 10^{-3}$     |
|                          | 2   | $7.3\cdot 10^{-3}$        | $3.1\cdot 10^{-2}$                | $1.6\cdot 10^{-3}$     | $7.0\cdot 10^{-3}$        | $3.0\cdot 10^{-2}$                | $1.6\cdot 10^{-3}$     |
| MPcCl <sub>4</sub> /NO-1 | 1   | $7.7\cdot 10^{-3}$        | $2.5\cdot 10^{-2}$                | $1.4\cdot 10^{-3}$     | $7.7\cdot 10^{-3}$        | $2.5\cdot 10^{-2}$                | $1.4\cdot 10^{-3}$     |
|                          | 2   | $1.5\cdot 10^{-2}$        | $5.1\cdot 10^{-2}$                | $2.6\cdot 10^{-3}$     | $1.5\cdot 10^{-2}$        | $5.2\cdot 10^{-2}$                | $2.6\cdot 10^{-3}$     |
|                          | 3   | $8.0\cdot 10^{-3}$        | $2.6\cdot 10^{-2}$                | $1.4\cdot 10^{-3}$     | $7.9\cdot 10^{-3}$        | $2.6\cdot 10^{-2}$                | $1.4\cdot 10^{-3}$     |
| MPcCl <sub>4</sub> /NO-2 | 1   | $6.4\cdot 10^{-3}$        | $1.9\cdot 10^{-2}$                | $9.6\cdot 10^{-4}$     | $6.6\cdot 10^{-3}$        | $2.0\cdot 10^{-2}$                | $9.9\cdot 10^{-4}$     |
|                          | 2   | $6.0\cdot 10^{-3}$        | $2.1\cdot 10^{-2}$                | $1.1\cdot 10^{-3}$     | $6.0\cdot 10^{-3}$        | $2.1\cdot 10^{-2}$                | $1.0\cdot 10^{-3}$     |
| MPcCl <sub>4</sub> /NO-3 | 1   | $7.9\cdot 10^{-3}$        | $2.5\cdot 10^{-2}$                | $1.3\cdot 10^{-3}$     | $7.8\cdot 10^{-3}$        | $2.5\cdot 10^{-2}$                | $1.3\cdot 10^{-3}$     |
|                          | 2   | $9.0\cdot 10^{-3}$        | $3.3\cdot 10^{-2}$                | $1.9\cdot 10^{-3}$     | $8.7\cdot 10^{-3}$        | $3.2\cdot 10^{-2}$                | $1.9\cdot 10^{-3}$     |
| MPcCl <sub>4</sub> /NO-4 | 1   | $8.2\cdot 10^{-3}$        | $2.6\cdot 10^{-2}$                | $1.4\cdot 10^{-3}$     | $8.5\cdot 10^{-3}$        | $2.7\cdot 10^{-2}$                | $1.4\cdot 10^{-3}$     |
|                          | 2   | $9.3\cdot 10^{-3}$        | $3.4\cdot 10^{-2}$                | $2.0\cdot 10^{-3}$     | $8.3\cdot 10^{-3}$        | $3.0\cdot 10^{-2}$                | $1.8\cdot 10^{-3}$     |

**Table S2.** Topological parameters at bond critical points and binding energy of NO molecule with cobalt and iron phthalocyanine dimmers.

| Aggregate               | BCP | M = Co                    |                                   |                        | M = Fe                    |                                   |                        |
|-------------------------|-----|---------------------------|-----------------------------------|------------------------|---------------------------|-----------------------------------|------------------------|
|                         |     | $\rho(\mathbf{r})$ , a.u. | $\nabla^2\rho(\mathbf{r})$ , a.u. | $h(\mathbf{r})$ , a.u. | $\rho(\mathbf{r})$ , a.u. | $\nabla^2\rho(\mathbf{r})$ , a.u. | $h(\mathbf{r})$ , a.u. |
| 2MPc/NO                 | 1   | $7.6 \cdot 10^{-3}$       | $2.9 \cdot 10^{-2}$               | $1.6 \cdot 10^{-3}$    | $7.8 \cdot 10^{-3}$       | $3.0 \cdot 10^{-2}$               | $1.6 \cdot 10^{-3}$    |
|                         | 2   | $7.3 \cdot 10^{-3}$       | $3.0 \cdot 10^{-2}$               | $1.7 \cdot 10^{-3}$    | $7.7 \cdot 10^{-3}$       | $3.2 \cdot 10^{-2}$               | $1.8 \cdot 10^{-3}$    |
|                         | 3   | $9.1 \cdot 10^{-3}$       | $2.9 \cdot 10^{-2}$               | $1.5 \cdot 10^{-3}$    | $9.5 \cdot 10^{-3}$       | $3.1 \cdot 10^{-2}$               | $1.6 \cdot 10^{-3}$    |
|                         | 4   | $4.6 \cdot 10^{-3}$       | $1.4 \cdot 10^{-2}$               | $7.8 \cdot 10^{-4}$    | $4.3 \cdot 10^{-3}$       | $1.3 \cdot 10^{-2}$               | $7.3 \cdot 10^{-4}$    |
|                         | 5   | $3.4 \cdot 10^{-3}$       | $1.2 \cdot 10^{-2}$               | $7.5 \cdot 10^{-4}$    | $3.7 \cdot 10^{-3}$       | $1.3 \cdot 10^{-2}$               | $8.2 \cdot 10^{-4}$    |
|                         | 6   | $1.9 \cdot 10^{-2}$       | $6.5 \cdot 10^{-2}$               | $2.7 \cdot 10^{-3}$    | $2.0 \cdot 10^{-2}$       | $6.7 \cdot 10^{-2}$               | $2.7 \cdot 10^{-3}$    |
| 2MPcF <sub>4</sub> /NO  | 1   | $7.2 \cdot 10^{-3}$       | $2.7 \cdot 10^{-2}$               | $1.5 \cdot 10^{-3}$    | $7.5 \cdot 10^{-3}$       | $2.8 \cdot 10^{-2}$               | $1.6 \cdot 10^{-3}$    |
|                         | 2   | $7.4 \cdot 10^{-3}$       | $3.1 \cdot 10^{-2}$               | $1.8 \cdot 10^{-3}$    | $7.8 \cdot 10^{-3}$       | $3.3 \cdot 10^{-2}$               | $1.8 \cdot 10^{-3}$    |
|                         | 3   | $9.6 \cdot 10^{-3}$       | $3.1 \cdot 10^{-2}$               | $1.6 \cdot 10^{-3}$    | $1.0 \cdot 10^{-2}$       | $3.2 \cdot 10^{-2}$               | $1.6 \cdot 10^{-3}$    |
|                         | 4   | $4.8 \cdot 10^{-3}$       | $1.5 \cdot 10^{-2}$               | $8.3 \cdot 10^{-4}$    | $4.4 \cdot 10^{-3}$       | $1.4 \cdot 10^{-2}$               | $7.5 \cdot 10^{-4}$    |
|                         | 5   | $3.5 \cdot 10^{-3}$       | $1.2 \cdot 10^{-2}$               | $7.6 \cdot 10^{-4}$    | $3.7 \cdot 10^{-3}$       | $1.3 \cdot 10^{-2}$               | $8.1 \cdot 10^{-4}$    |
|                         | 6   | $1.7 \cdot 10^{-2}$       | $5.9 \cdot 10^{-2}$               | $2.7 \cdot 10^{-3}$    | $1.8 \cdot 10^{-2}$       | $6.1 \cdot 10^{-2}$               | $2.7 \cdot 10^{-3}$    |
| 2MPcCl <sub>4</sub> /NO | 1   | $6.9 \cdot 10^{-3}$       | $2.6 \cdot 10^{-2}$               | $1.4 \cdot 10^{-3}$    | $7.2 \cdot 10^{-3}$       | $2.8 \cdot 10^{-2}$               | $1.5 \cdot 10^{-3}$    |
|                         | 2   | $7.3 \cdot 10^{-3}$       | $3.1 \cdot 10^{-2}$               | $1.8 \cdot 10^{-3}$    | $7.6 \cdot 10^{-3}$       | $3.2 \cdot 10^{-2}$               | $1.8 \cdot 10^{-3}$    |
|                         | 3   | $9.5 \cdot 10^{-3}$       | $3.0 \cdot 10^{-2}$               | $1.5 \cdot 10^{-3}$    | $9.8 \cdot 10^{-3}$       | $3.1 \cdot 10^{-2}$               | $1.6 \cdot 10^{-3}$    |
|                         | 4   | $4.9 \cdot 10^{-3}$       | $1.5 \cdot 10^{-2}$               | $8.5 \cdot 10^{-4}$    | $4.6 \cdot 10^{-3}$       | $1.4 \cdot 10^{-2}$               | $8.0 \cdot 10^{-4}$    |
|                         | 5   | $3.5 \cdot 10^{-3}$       | $1.2 \cdot 10^{-2}$               | $7.6 \cdot 10^{-4}$    | $3.7 \cdot 10^{-3}$       | $1.3 \cdot 10^{-2}$               | $8.1 \cdot 10^{-4}$    |
|                         | 6   | $1.7 \cdot 10^{-2}$       | $5.9 \cdot 10^{-2}$               | $2.7 \cdot 10^{-3}$    | $1.7 \cdot 10^{-2}$       | $5.9 \cdot 10^{-2}$               | $2.7 \cdot 10^{-3}$    |
